# Supplementary material
Source: PubMed Central journal article supplement (PMC4576130)
Supplement: AAC.00932-15_zac010154391so1.pdf [file AAC.00932-15_zac010154391so1.pdf]

## Supplemental Information

**Table S1.** Overview of clinical studies included in the analysis

| Trial                      | Trial identifier(s)        | Patient population               | HCV GT | No. of patients | Treatment                                                     | Duration                                                                |
|----------------------------|----------------------------|----------------------------------|--------|-----------------|---------------------------------------------------------------|-------------------------------------------------------------------------|
| Phase 2 studies            |                            |                                  |        |                 |                                                               |                                                                         |
| SILEN-C1                   | NCT00774397                | Treatment-naïve                  | GT-1   | 429             | Placebo+PR<br>FDV 120 mg QD + PR<br>FDV 240 mg QD + PR +/- LI | 24 weeks combination<br>+ 24 or 48 weeks PR<br>(RGT) <sup>a</sup>       |
| SILEN-C2                   | NCT00774397                | Treatment-experienced            | GT-1   | 288             | FDV 240 mg QD + PR +/- LI<br>FDV 240 mg BID + PR + LI         | 24 weeks combination<br>+ 24 or 48 weeks PR<br>(RGT) <sup>b</sup>       |
| SILEN-C3                   | NCT00984620                | Treatment-naïve                  | GT-1   | 159             | FDV 120 mg QD + PR                                            | 12 or 24 weeks combination<br>+ 24 or 48 weeks PR (RGT)                 |
| Phase 3 studies            |                            |                                  |        |                 |                                                               |                                                                         |
| STARTVerso1<br>STARTVerso2 | NCT01343888<br>NCT01297270 | Treatment-naïve                  | GT-1   | 652<br>657      | Placebo+PR<br>FDV 120 mg QD + PR<br>FDV 240 mg QD + PR        | 12 or 24 weeks<br>combination <sup>c</sup><br>+ 24 or 48 weeks PR (RGT) |
| STARTVerso3                | NCT01358864                | Treatment-experienced            | GT-1   | 677             | Placebo+PR<br>FDV 240 mg QD + PR                              | 12 or 24 weeks<br>combination <sup>d</sup><br>+ 24 or 48 weeks PR (RGT) |
| STARTVerso4                | NCT01399619                | HCV/HIV-co-infected <sup>e</sup> | GT-1   | 308             | FDV 120 mg QD + PR<br>FDV 240 mg QD + PR                      | 12 or 24 weeks combination<br>+ 24 or 48 weeks PR (RGT)                 |

<sup>a</sup>Reduced PR duration in faldaprevir 240 mg arms only.

<sup>b</sup>Reduced PR duration in faldaprevir 240 mg QD/LI arm only.

<sup>c</sup>Faldaprevir 240 mg 12 weeks, faldaprevir 120 mg 24 weeks in STARTVerso2, 12 or 24 weeks by RGT in STARTVerso1.

<sup>d</sup>Treatment duration by randomization.

<sup>e</sup>Includes treatment-naïve + treatment-experienced patients.

BID, twice daily; FDV, faldaprevir; GT, genotype; LI, 3 day PR lead-in; PR, pegylated interferon/ribavirin; QD, once daily; RGT, response-guided therapy (based on HCV RNA of <25 IU/ml at week 4 and undetectable at weeks 8 [and at week 12 for phase 2 studies]).

**Table S2.** GenBank Accession numbers for baseline NS3/4A sequences

| Clinical Study     | NS3/4A or NS3 aa1-181 | Reference                                            |
|--------------------|-----------------------|------------------------------------------------------|
| 1220.2 and 1220.14 | KT232323 - KT232440   | Berger et al. AAC 2014 (1)                           |
| SILEN-C1, C2, C3   | KT232441 - KT233302   | Berger et al. AAC 2014 (1)<br>and present manuscript |
| STARTVerso 1,2,3,4 | KT233303 - KT235564   | Present manuscript                                   |

**TABLE S3.** Numbers of patients with NS3/4A baseline sequence data

| Trial        | Trial identifier(s) | Patient population                      | GT-1a                  |                                  |                                         | GT-1b                  |                     |                            |
|--------------|---------------------|-----------------------------------------|------------------------|----------------------------------|-----------------------------------------|------------------------|---------------------|----------------------------|
|              |                     |                                         | No. of patients in FAS | NS3 protease, <sup>a</sup> n (%) | NS3 helicase + NS4A, <sup>b</sup> n (%) | No. of patients in FAS | NS3 protease, n (%) | NS3 helicase + NS4A, n (%) |
| SILEN-C1     | NCT00774397         | Treatment-naïve + treatment-experienced | 385                    | 385 (100)                        | 385 (100)                               | 477                    | 477 (100)           | 477 (100)                  |
| SILEN-C2     | NCT00774397         |                                         |                        |                                  |                                         |                        |                     |                            |
| SILEN-C3     | NCT00984620         |                                         |                        |                                  |                                         |                        |                     |                            |
| STARTVerso1  | NCT01343888         | Treatment-naïve                         | 625                    | 616 (99)                         | 436 (70)                                | 680                    | 675 (99)            | 574 (84)                   |
| STARTVerso2  | NCT01297270         |                                         |                        |                                  |                                         |                        |                     |                            |
| STARTVerso3  | NCT01358864         | Treatment-experienced                   | 316                    | 308 (97)                         | 237 (75)                                | 360                    | 358 (99)            | 311 (86)                   |
| STARTVerso4  | NCT01399619         | HCV/HIV-co-infected <sup>c</sup>        | 242                    | 240 (99)                         | 145 (60)                                | 66                     | 65 (98)             | 53 (80)                    |
| <b>TOTAL</b> |                     |                                         | 1568                   | 1549 (99)                        | 1203 (77)                               | 1583                   | 1575 (99)           | 1415 (89)                  |

<sup>a</sup>NS3 amino acids 1–181.

<sup>b</sup>NS3 amino acids 182–631 + NS4A amino acids 1–54.

<sup>c</sup>Includes treatment-naïve + treatment-experienced patients.

FAS, full analysis set; GT, genotype; n, number of patients with sequence data available.

**TABLE S4.** Numbers of non-SVR12 patients treated with faldaprevir+PR who had post-baseline NS3/4A sequence data

| Trial        | Trial identifier(s) | Patient population                      | GT-1a                  |                                  |                                         | GT-1b                  |                     |                            |
|--------------|---------------------|-----------------------------------------|------------------------|----------------------------------|-----------------------------------------|------------------------|---------------------|----------------------------|
|              |                     |                                         | No. of patients in FAS | NS3 protease, <sup>a</sup> n (%) | NS3 helicase + NS4A, <sup>b</sup> n (%) | No. of patients in FAS | NS3 protease, n (%) | NS3 helicase + NS4A, n (%) |
| SILEN-C1     | NCT00774397         | Treatment-naïve + treatment-experienced | 385                    | 154 (40)                         | 154 (40)                                | 477                    | 121 (31)            | 121 (31)                   |
| SILEN-C2     | NCT00774397         |                                         |                        |                                  |                                         |                        |                     |                            |
| SILEN-C3     | NCT00984620         |                                         |                        |                                  |                                         |                        |                     |                            |
| STARTVerso1  | NCT01343888         | Treatment-naïve                         | 625                    | 154 (25)                         | 222 (19)                                | 680                    | 85 (13)             | 186 (17)                   |
| STARTVerso2  | NCT01297270         |                                         |                        |                                  |                                         |                        |                     |                            |
| STARTVerso3  | NCT01358864         | Treatment-experienced                   | 316                    | 142 (45)                         |                                         | 360                    | 132 (37)            |                            |
| STARTVerso4  | NCT01399619         | HCV/HIV co-infected <sup>c</sup>        | 242                    | 57 (24)                          |                                         | 66                     | 11 (17)             |                            |
| <b>TOTAL</b> |                     |                                         | 1568                   | 507 (32)                         | 376 (24)                                | 1583                   | 349 (22)            | 307 (19)                   |

Only patients with baseline and at least one post-baseline sequence are included in the table.

<sup>a</sup>NS3 amino acids 1–181.

<sup>b</sup>NS3 amino acids 182–631 + NS4A amino acids 1–54.

<sup>c</sup>Treatment-naïve + treatment-experienced patients.

FAS, full analysis set; GT, genotype; n, number of patients with sequence data available; PR, pegylated interferon/ribavirin; SVR12, sustained virologic response at 12 weeks post-treatment.

**TABLE S5.** Frequency of GT-1b NS3 helicase amino acid T344 polymorphisms in baseline samples from patients enrolled in phase 3 studies

| <b>Amino acid polymorphism</b> | <b>Frequency among baseline isolates</b> |                             |
|--------------------------------|------------------------------------------|-----------------------------|
|                                | <b>TN<br/>(STARTVerso1 + 2)</b>          | <b>TE<br/>(STARTVerso3)</b> |
| T344 wild-type <sup>a</sup>    | 434/574 (75.6%)                          | 206/311 (66.2%)             |
| T344I or I/T                   | 87/574 (15.2%)                           | 75/311 (24.1%)              |
| T344V                          | 25/574 (4.4%)                            | 18/311 (5.8%)               |
| T344 other <sup>b</sup>        | 28/574 (4.9%)                            | 12/311 (3.9%)               |

<sup>a</sup>Wild-type does not include mixtures of wild-type with amino acid variants.

<sup>b</sup>Other variants or amino acid mixtures.

TE, treatment-experienced; TN, treatment-naïve.

**TABLE S6.** SVR24 rates with baseline GT-1b T344I in phase 2 studies

| NS3 Variant | Patient group  | With variant                    |                    | Without variant                 |                    | Fisher's P        |
|-------------|----------------|---------------------------------|--------------------|---------------------------------|--------------------|-------------------|
|             |                | Total no. patients <sup>a</sup> | No. with SVR24 (%) | Total no. patients <sup>b</sup> | No. with SVR24 (%) |                   |
| GT-1b T344I | TN + TE pooled | 93                              | 40 (43.0)          | 346                             | 263 (76.0)         | <b>&lt;0.0001</b> |
|             | TN             | 52                              | 30 (57.7)          | 251                             | 217 (86.5)         | <b>&lt;0.0001</b> |
|             | TE             | 41                              | 10 (24.4)          | 95                              | 46 (48.4)          | <b>0.0131</b>     |

<sup>a</sup>“With variant” includes only the single amino acid variant of interest and does not include wild-type, other variants, or mixtures of the variant of interest with wild-type or other amino acids.

<sup>b</sup>“Without variant” includes wild-type and all other amino acid variants or mixtures detected. GT, genotype; TE, treatment-experienced; TN, treatment-naïve; SVR24, sustained virologic response at 24 weeks post-treatment.

**TABLE S7.** *In vitro* characterization of NS3 S61L site-directed mutants on HCV GT-1b drug susceptibility

| NS3 site-directed mutant | Mean EC <sub>50</sub> nM ± SD (n) |                   |                  |
|--------------------------|-----------------------------------|-------------------|------------------|
|                          | FDV                               | SMV               | TVR              |
| Wild-type                | 25 ± 8<br>(4)                     | 2.5 ± 0.4<br>(4)  | 930 ± 64<br>(4)  |
| S61L                     | 46 ± 25<br>(4)                    | 5.7 ± 0.3<br>(4)  | 949 ± 210<br>(3) |
| D168V                    | 29,448 ± 12,777<br>(4)            | 4281 ± 989<br>(4) | 336 ± 46<br>(4)  |
| S61L+D168V               | 46,447 ± 6601<br>(3)              | 3264 ± 422<br>(3) | 425 ± 126<br>(3) |

Means calculated from inter-experimental values.

EC<sub>50</sub>, 50% effective concentration; FDV, faldaprevir; n, number of experiments; SD, standard deviation; SMV, simeprevir; TVR, telaprevir.

1. **Berger KL, Triki I, Cartier M, Marquis M, Massariol MJ, Bocher WO, Datsenko Y, Steinmann G, Scherer J, Stern JO, Kukolj G.** 2014. Baseline hepatitis C virus (HCV) NS3 polymorphisms and their impact on treatment response in clinical studies of the HCV NS3 protease inhibitor faldaprevir. *Antimicrob. Agents Chemother.* **58**:698-705.
